# Supplementary material for: Using IRTree Models to Promote Selection Validity in the Presence of Extreme Response Styles
Source: MDPI journal article supplement (doi:10.3390/jintelligence11110216), 2023-11-17
Supplement: s1 [file s1]

# Supplementary Materials

**Table S1.** Simulation Results, N = 500, n = 25.

| Sel.<br>Rate | Gen. Mod.         | Fit<br>Mod. | Correct<br>Decision<br>Rate |      | Sensitivity |      | Specificity |      | Positive<br>Predictive<br>Value |      | Negative<br>Predictive<br>Value |      |
|--------------|-------------------|-------------|-----------------------------|------|-------------|------|-------------|------|---------------------------------|------|---------------------------------|------|
|              |                   |             | M                           | SD   | M           | SD   | M           | SD   | M                               | SD   | M                               | SD   |
| 0.1          | GPCM              | GPCM        | 0.97                        | 0.01 | 0.88        | 0.05 | 0.98        | 0.01 | 0.83                            | 0.04 | 0.99                            | 0.01 |
|              |                   | IRTree      | 0.97                        | 0.01 | 0.87        | 0.04 | 0.98        | 0.01 | 0.83                            | 0.04 | 0.99                            | 0.00 |
|              | IRTree            | GPCM        | 0.93                        | 0.01 | 0.63        | 0.06 | 0.96        | 0.01 | 0.65                            | 0.06 | 0.96                            | 0.01 |
|              |                   | IRTree      | 0.95                        | 0.01 | 0.79        | 0.06 | 0.97        | 0.01 | 0.72                            | 0.05 | 0.98                            | 0.01 |
|              | IRTree:Non-Invar. | GPCM        | 0.93                        | 0.01 | 0.67        | 0.07 | 0.96        | 0.01 | 0.67                            | 0.06 | 0.96                            | 0.01 |
|              |                   | IRTree      | 0.95                        | 0.01 | 0.79        | 0.05 | 0.97        | 0.01 | 0.72                            | 0.04 | 0.98                            | 0.01 |
| 0.15         | GPCM              | GPCM        | 0.97                        | 0.01 | 0.91        | 0.03 | 0.98        | 0.01 | 0.87                            | 0.04 | 0.98                            | 0.01 |
|              |                   | IRTree      | 0.97                        | 0.01 | 0.90        | 0.04 | 0.98        | 0.01 | 0.88                            | 0.04 | 0.98                            | 0.01 |
|              | IRTree            | GPCM        | 0.92                        | 0.01 | 0.69        | 0.05 | 0.96        | 0.01 | 0.74                            | 0.04 | 0.95                            | 0.01 |
|              |                   | IRTree      | 0.94                        | 0.01 | 0.85        | 0.04 | 0.96        | 0.01 | 0.78                            | 0.04 | 0.97                            | 0.01 |
|              | IRTree:Non-Invar. | GPCM        | 0.92                        | 0.01 | 0.72        | 0.05 | 0.96        | 0.01 | 0.74                            | 0.05 | 0.95                            | 0.01 |
|              |                   | IRTree      | 0.94                        | 0.01 | 0.85        | 0.04 | 0.96        | 0.01 | 0.78                            | 0.04 | 0.97                            | 0.01 |
| 0.2          | GPCM              | GPCM        | 0.96                        | 0.01 | 0.93        | 0.03 | 0.97        | 0.01 | 0.90                            | 0.03 | 0.98                            | 0.01 |
|              |                   | IRTree      | 0.96                        | 0.01 | 0.92        | 0.03 | 0.97        | 0.01 | 0.90                            | 0.03 | 0.98                            | 0.01 |
|              | IRTree            | GPCM        | 0.91                        | 0.01 | 0.75        | 0.05 | 0.95        | 0.01 | 0.80                            | 0.04 | 0.94                            | 0.01 |
|              |                   | IRTree      | 0.94                        | 0.01 | 0.89        | 0.03 | 0.95        | 0.01 | 0.83                            | 0.03 | 0.97                            | 0.01 |
|              | IRTree:Non-Invar. | GPCM        | 0.91                        | 0.01 | 0.77        | 0.05 | 0.95        | 0.01 | 0.80                            | 0.04 | 0.94                            | 0.01 |
|              |                   | IRTree      | 0.94                        | 0.01 | 0.88        | 0.04 | 0.95        | 0.01 | 0.82                            | 0.03 | 0.97                            | 0.01 |
| 0.25         | GPCM              | GPCM        | 0.96                        | 0.01 | 0.93        | 0.02 | 0.97        | 0.01 | 0.92                            | 0.03 | 0.98                            | 0.01 |
|              |                   | IRTree      | 0.96                        | 0.01 | 0.93        | 0.02 | 0.97        | 0.01 | 0.92                            | 0.03 | 0.98                            | 0.01 |
|              | IRTree            | GPCM        | 0.91                        | 0.01 | 0.79        | 0.03 | 0.95        | 0.01 | 0.83                            | 0.03 | 0.93                            | 0.01 |
|              |                   | IRTree      | 0.93                        | 0.01 | 0.89        | 0.02 | 0.94        | 0.01 | 0.84                            | 0.02 | 0.96                            | 0.01 |
|              | IRTree:Non-Invar. | GPCM        | 0.91                        | 0.01 | 0.81        | 0.03 | 0.95        | 0.01 | 0.84                            | 0.03 | 0.94                            | 0.01 |
|              |                   | IRTree      | 0.93                        | 0.01 | 0.89        | 0.03 | 0.95        | 0.01 | 0.85                            | 0.03 | 0.96                            | 0.01 |
| 0.5          | GPCM              | GPCM        | 0.96                        | 0.01 | 0.95        | 0.02 | 0.96        | 0.01 | 0.96                            | 0.01 | 0.95                            | 0.02 |
|              |                   | IRTree      | 0.95                        | 0.01 | 0.95        | 0.02 | 0.96        | 0.02 | 0.96                            | 0.01 | 0.95                            | 0.02 |
|              | IRTree            | GPCM        | 0.93                        | 0.01 | 0.93        | 0.02 | 0.93        | 0.02 | 0.93                            | 0.02 | 0.93                            | 0.02 |
|              |                   | IRTree      | 0.93                        | 0.01 | 0.93        | 0.02 | 0.93        | 0.02 | 0.93                            | 0.02 | 0.93                            | 0.02 |
|              | IRTree:Non-Invar. | GPCM        | 0.93                        | 0.01 | 0.93        | 0.02 | 0.93        | 0.02 | 0.93                            | 0.02 | 0.93                            | 0.02 |
|              |                   | IRTree      | 0.93                        | 0.01 | 0.93        | 0.02 | 0.93        | 0.02 | 0.93                            | 0.02 | 0.93                            | 0.02 |
| 0.6          | GPCM              | GPCM        | 0.95                        | 0.01 | 0.96        | 0.01 | 0.95        | 0.02 | 0.97                            | 0.01 | 0.94                            | 0.02 |
|              |                   | IRTree      | 0.95                        | 0.01 | 0.96        | 0.01 | 0.95        | 0.02 | 0.97                            | 0.01 | 0.94                            | 0.02 |
|              | IRTree            | GPCM        | 0.92                        | 0.01 | 0.94        | 0.01 | 0.90        | 0.03 | 0.93                            | 0.02 | 0.91                            | 0.02 |
|              |                   | IRTree      | 0.93                        | 0.01 | 0.94        | 0.01 | 0.92        | 0.02 | 0.95                            | 0.01 | 0.91                            | 0.02 |
|              |                   | GPCM        | 0.93                        | 0.01 | 0.94        | 0.02 | 0.90        | 0.02 | 0.94                            | 0.01 | 0.91                            | 0.02 |

|     |                   |        |      |      |      |      |      |      |      |      |      |      |
|-----|-------------------|--------|------|------|------|------|------|------|------|------|------|------|
| 0.7 | IRTree:Non-Invar. | IRTree | 0.93 | 0.01 | 0.94 | 0.02 | 0.92 | 0.02 | 0.95 | 0.01 | 0.91 | 0.02 |
|     |                   | GPCM   | 0.95 | 0.01 | 0.96 | 0.01 | 0.93 | 0.02 | 0.97 | 0.01 | 0.91 | 0.02 |
|     | GPCM              | IRTree | 0.95 | 0.01 | 0.96 | 0.01 | 0.93 | 0.03 | 0.97 | 0.01 | 0.91 | 0.02 |
|     |                   | GPCM   | 0.92 | 0.01 | 0.95 | 0.01 | 0.84 | 0.03 | 0.93 | 0.01 | 0.87 | 0.03 |
|     | IRTree            | IRTree | 0.93 | 0.01 | 0.94 | 0.01 | 0.90 | 0.02 | 0.96 | 0.01 | 0.87 | 0.03 |
|     |                   | GPCM   | 0.91 | 0.02 | 0.95 | 0.01 | 0.84 | 0.04 | 0.93 | 0.01 | 0.87 | 0.03 |
| 0.8 | IRTree:Non-Invar. | IRTree | 0.93 | 0.01 | 0.94 | 0.01 | 0.91 | 0.03 | 0.96 | 0.01 | 0.87 | 0.02 |
|     |                   | GPCM   | 0.95 | 0.01 | 0.96 | 0.01 | 0.90 | 0.03 | 0.98 | 0.01 | 0.86 | 0.03 |
|     | GPCM              | IRTree | 0.95 | 0.01 | 0.96 | 0.01 | 0.90 | 0.03 | 0.98 | 0.01 | 0.86 | 0.03 |
|     |                   | GPCM   | 0.91 | 0.01 | 0.95 | 0.01 | 0.75 | 0.04 | 0.94 | 0.01 | 0.79 | 0.04 |
|     | IRTree            | IRTree | 0.94 | 0.01 | 0.95 | 0.01 | 0.88 | 0.04 | 0.97 | 0.01 | 0.82 | 0.03 |
|     |                   | GPCM   | 0.91 | 0.01 | 0.95 | 0.01 | 0.75 | 0.04 | 0.94 | 0.01 | 0.80 | 0.04 |
| 0.9 | IRTree:Non-Invar. | IRTree | 0.94 | 0.01 | 0.95 | 0.01 | 0.88 | 0.03 | 0.97 | 0.01 | 0.82 | 0.03 |
|     |                   | GPCM   | 0.96 | 0.01 | 0.98 | 0.01 | 0.84 | 0.05 | 0.98 | 0.01 | 0.80 | 0.05 |
|     | GPCM              | IRTree | 0.96 | 0.01 | 0.98 | 0.01 | 0.84 | 0.05 | 0.98 | 0.01 | 0.80 | 0.05 |
|     |                   | GPCM   | 0.93 | 0.01 | 0.96 | 0.01 | 0.63 | 0.06 | 0.96 | 0.01 | 0.65 | 0.06 |
|     | IRTree            | IRTree | 0.95 | 0.01 | 0.97 | 0.01 | 0.79 | 0.06 | 0.98 | 0.01 | 0.72 | 0.05 |
|     |                   | GPCM   | 0.93 | 0.01 | 0.96 | 0.01 | 0.64 | 0.06 | 0.96 | 0.01 | 0.66 | 0.07 |
|     | IRTree:Non-Invar. | IRTree | 0.95 | 0.01 | 0.97 | 0.01 | 0.80 | 0.05 | 0.98 | 0.01 | 0.73 | 0.05 |

**Table S2.** Simulation Results, N = 500, n = 50.

| Sel. Rat e | Gen. Mod.         | Fit Mod. | Correct Decision Rate |      | Sensitivity |      | Specificity |      | Positive Predictive Value |      | Negative Predictive Value |      |
|------------|-------------------|----------|-----------------------|------|-------------|------|-------------|------|---------------------------|------|---------------------------|------|
|            |                   |          | M                     | SD   | M           | SD   | M           | SD   | M                         | SD   | M                         | SD   |
| 0.1        | GPCM              | GPCM     | 0.98                  | 0.01 | 0.91        | 0.05 | 0.99        | 0.01 | 0.89                      | 0.05 | 0.99                      | 0.01 |
|            |                   | IRTree   | 0.98                  | 0.01 | 0.91        | 0.04 | 0.99        | 0.01 | 0.88                      | 0.05 | 0.99                      | 0.00 |
|            | IRTree            | GPCM     | 0.94                  | 0.01 | 0.65        | 0.07 | 0.97        | 0.01 | 0.69                      | 0.07 | 0.96                      | 0.01 |
|            |                   | IRTree   | 0.96                  | 0.01 | 0.85        | 0.05 | 0.98        | 0.01 | 0.80                      | 0.05 | 0.98                      | 0.01 |
|            | IRTree:Non-Invar. | GPCM     | 0.94                  | 0.01 | 0.69        | 0.06 | 0.97        | 0.01 | 0.72                      | 0.06 | 0.97                      | 0.01 |
|            |                   | IRTree   | 0.96                  | 0.01 | 0.85        | 0.05 | 0.98        | 0.01 | 0.79                      | 0.05 | 0.98                      | 0.01 |
| 0.15       | GPCM              | GPCM     | 0.98                  | 0.01 | 0.93        | 0.03 | 0.98        | 0.01 | 0.92                      | 0.03 | 0.99                      | 0.01 |
|            |                   | IRTree   | 0.98                  | 0.01 | 0.93        | 0.03 | 0.98        | 0.01 | 0.92                      | 0.04 | 0.99                      | 0.01 |
|            | IRTree            | GPCM     | 0.92                  | 0.01 | 0.70        | 0.05 | 0.96        | 0.01 | 0.77                      | 0.06 | 0.95                      | 0.01 |
|            |                   | IRTree   | 0.96                  | 0.01 | 0.88        | 0.04 | 0.97        | 0.01 | 0.84                      | 0.04 | 0.98                      | 0.01 |
|            | IRTree:Non-Invar. | GPCM     | 0.93                  | 0.01 | 0.74        | 0.04 | 0.96        | 0.01 | 0.78                      | 0.05 | 0.95                      | 0.01 |
|            |                   | IRTree   | 0.96                  | 0.01 | 0.88        | 0.04 | 0.97        | 0.01 | 0.84                      | 0.04 | 0.98                      | 0.01 |
| 0.2        | GPCM              | GPCM     | 0.97                  | 0.01 | 0.94        | 0.03 | 0.98        | 0.01 | 0.92                      | 0.03 | 0.99                      | 0.01 |
|            |                   | IRTree   | 0.97                  | 0.01 | 0.94        | 0.03 | 0.98        | 0.01 | 0.93                      | 0.03 | 0.98                      | 0.01 |
|            | IRTree            | GPCM     | 0.92                  | 0.01 | 0.76        | 0.04 | 0.96        | 0.01 | 0.82                      | 0.04 | 0.94                      | 0.01 |

|        |                   |        |      |      |      |      |      |      |      |      |      |      |
|--------|-------------------|--------|------|------|------|------|------|------|------|------|------|------|
| 0.25   | IRTree:Non-Invar. | IRTree | 0.95 | 0.01 | 0.91 | 0.03 | 0.97 | 0.01 | 0.87 | 0.03 | 0.98 | 0.01 |
|        |                   | GPCM   | 0.93 | 0.01 | 0.78 | 0.04 | 0.96 | 0.01 | 0.83 | 0.04 | 0.95 | 0.01 |
|        |                   | IRTree | 0.95 | 0.01 | 0.91 | 0.03 | 0.96 | 0.01 | 0.87 | 0.03 | 0.98 | 0.01 |
|        | GPCM              | GPCM   | 0.97 | 0.01 | 0.95 | 0.02 | 0.98 | 0.01 | 0.94 | 0.02 | 0.98 | 0.01 |
|        |                   | IRTree | 0.97 | 0.01 | 0.94 | 0.02 | 0.98 | 0.01 | 0.95 | 0.02 | 0.98 | 0.01 |
|        | IRTree            | GPCM   | 0.92 | 0.01 | 0.81 | 0.04 | 0.96 | 0.01 | 0.87 | 0.03 | 0.94 | 0.01 |
|        |                   | IRTree | 0.95 | 0.01 | 0.92 | 0.02 | 0.96 | 0.01 | 0.89 | 0.03 | 0.97 | 0.01 |
|        | IRTree:Non-Invar. | GPCM   | 0.93 | 0.01 | 0.83 | 0.04 | 0.96 | 0.01 | 0.88 | 0.03 | 0.94 | 0.01 |
| IRTree |                   | 0.95   | 0.01 | 0.92 | 0.03 | 0.96 | 0.01 | 0.89 | 0.03 | 0.97 | 0.01 |      |
| 0.5    | GPCM              | GPCM   | 0.97 | 0.01 | 0.97 | 0.02 | 0.97 | 0.02 | 0.97 | 0.02 | 0.97 | 0.01 |
|        |                   | IRTree | 0.97 | 0.01 | 0.97 | 0.01 | 0.97 | 0.01 | 0.97 | 0.01 | 0.97 | 0.01 |
|        | IRTree            | GPCM   | 0.95 | 0.01 | 0.95 | 0.01 | 0.95 | 0.02 | 0.95 | 0.02 | 0.95 | 0.01 |
|        |                   | IRTree | 0.95 | 0.01 | 0.95 | 0.02 | 0.95 | 0.02 | 0.95 | 0.02 | 0.95 | 0.01 |
|        | IRTree:Non-Invar. | GPCM   | 0.95 | 0.01 | 0.95 | 0.02 | 0.95 | 0.02 | 0.95 | 0.02 | 0.95 | 0.02 |
|        |                   | IRTree | 0.95 | 0.01 | 0.95 | 0.02 | 0.95 | 0.02 | 0.95 | 0.01 | 0.95 | 0.01 |
| 0.6    | GPCM              | GPCM   | 0.97 | 0.01 | 0.97 | 0.01 | 0.96 | 0.02 | 0.97 | 0.01 | 0.95 | 0.02 |
|        |                   | IRTree | 0.97 | 0.01 | 0.97 | 0.01 | 0.96 | 0.02 | 0.97 | 0.01 | 0.95 | 0.02 |
|        | IRTree            | GPCM   | 0.94 | 0.01 | 0.96 | 0.01 | 0.92 | 0.02 | 0.95 | 0.01 | 0.94 | 0.02 |
|        |                   | IRTree | 0.95 | 0.01 | 0.96 | 0.02 | 0.95 | 0.02 | 0.96 | 0.01 | 0.93 | 0.02 |
|        | IRTree:Non-Invar. | GPCM   | 0.94 | 0.01 | 0.96 | 0.02 | 0.92 | 0.02 | 0.95 | 0.02 | 0.94 | 0.02 |
|        |                   | IRTree | 0.95 | 0.01 | 0.96 | 0.01 | 0.94 | 0.02 | 0.96 | 0.01 | 0.93 | 0.02 |
| 0.7    | GPCM              | GPCM   | 0.96 | 0.01 | 0.97 | 0.01 | 0.95 | 0.02 | 0.98 | 0.01 | 0.93 | 0.03 |
|        |                   | IRTree | 0.96 | 0.01 | 0.97 | 0.01 | 0.95 | 0.02 | 0.98 | 0.01 | 0.93 | 0.02 |
|        | IRTree            | GPCM   | 0.93 | 0.01 | 0.96 | 0.01 | 0.86 | 0.03 | 0.94 | 0.01 | 0.90 | 0.02 |
|        |                   | IRTree | 0.95 | 0.01 | 0.96 | 0.01 | 0.93 | 0.02 | 0.97 | 0.01 | 0.91 | 0.02 |
|        | IRTree:Non-Invar. | GPCM   | 0.93 | 0.01 | 0.96 | 0.01 | 0.86 | 0.03 | 0.94 | 0.01 | 0.91 | 0.02 |
|        |                   | IRTree | 0.95 | 0.01 | 0.96 | 0.01 | 0.93 | 0.02 | 0.97 | 0.01 | 0.91 | 0.02 |
| 0.8    | GPCM              | GPCM   | 0.97 | 0.01 | 0.98 | 0.01 | 0.93 | 0.03 | 0.98 | 0.01 | 0.91 | 0.03 |
|        |                   | IRTree | 0.97 | 0.01 | 0.98 | 0.01 | 0.93 | 0.03 | 0.98 | 0.01 | 0.91 | 0.03 |
|        | IRTree            | GPCM   | 0.92 | 0.01 | 0.96 | 0.01 | 0.76 | 0.04 | 0.94 | 0.01 | 0.83 | 0.04 |
|        |                   | IRTree | 0.95 | 0.01 | 0.97 | 0.01 | 0.91 | 0.03 | 0.98 | 0.01 | 0.87 | 0.03 |
|        | IRTree:Non-Invar. | GPCM   | 0.92 | 0.01 | 0.96 | 0.01 | 0.76 | 0.04 | 0.94 | 0.01 | 0.83 | 0.04 |
|        |                   | IRTree | 0.96 | 0.01 | 0.97 | 0.01 | 0.91 | 0.03 | 0.98 | 0.01 | 0.87 | 0.03 |
| 0.9    | GPCM              | GPCM   | 0.97 | 0.01 | 0.98 | 0.01 | 0.89 | 0.05 | 0.99 | 0.01 | 0.86 | 0.05 |
|        |                   | IRTree | 0.97 | 0.01 | 0.98 | 0.01 | 0.89 | 0.05 | 0.99 | 0.01 | 0.86 | 0.05 |
|        | IRTree            | GPCM   | 0.93 | 0.01 | 0.97 | 0.01 | 0.65 | 0.06 | 0.96 | 0.01 | 0.68 | 0.06 |
|        |                   | IRTree | 0.96 | 0.01 | 0.98 | 0.01 | 0.85 | 0.06 | 0.98 | 0.01 | 0.79 | 0.05 |
|        | IRTree:Non-Invar. | GPCM   | 0.94 | 0.01 | 0.97 | 0.01 | 0.66 | 0.06 | 0.96 | 0.01 | 0.70 | 0.05 |
|        |                   | IRTree | 0.96 | 0.01 | 0.98 | 0.01 | 0.84 | 0.06 | 0.98 | 0.01 | 0.79 | 0.04 |

**Table S3.** Simulation Results, N = 1000, n = 25.

| Sel.<br>Rate | Gen. Mod.         | Fit<br>Mod. | Correct<br>Decision<br>Rate |      | Sensitivity |      | Specificity |      | Positive<br>Predictive<br>Value |      | Negative<br>Predictive<br>Value |      |
|--------------|-------------------|-------------|-----------------------------|------|-------------|------|-------------|------|---------------------------------|------|---------------------------------|------|
|              |                   |             | M                           | SD   | M           | SD   | M           | SD   | M                               | SD   | M                               | SD   |
| 0.1          | GPCM              | GPCM        | 0.97                        | 0.01 | 0.89        | 0.04 | 0.98        | 0.00 | 0.84                            | 0.03 | 0.99                            | 0.00 |
|              |                   | IRTree      | 0.97                        | 0.01 | 0.89        | 0.04 | 0.98        | 0.00 | 0.84                            | 0.04 | 0.99                            | 0.00 |
|              | IRTree            | GPCM        | 0.93                        | 0.01 | 0.64        | 0.04 | 0.96        | 0.01 | 0.65                            | 0.04 | 0.96                            | 0.00 |
|              |                   | IRTree      | 0.95                        | 0.01 | 0.80        | 0.04 | 0.97        | 0.01 | 0.73                            | 0.04 | 0.98                            | 0.00 |
|              | IRTree:Non-Invar. | GPCM        | 0.93                        | 0.01 | 0.67        | 0.04 | 0.96        | 0.01 | 0.67                            | 0.04 | 0.96                            | 0.00 |
|              |                   | IRTree      | 0.95                        | 0.01 | 0.80        | 0.05 | 0.97        | 0.01 | 0.73                            | 0.03 | 0.98                            | 0.01 |
| 0.15         | GPCM              | GPCM        | 0.97                        | 0.01 | 0.91        | 0.02 | 0.98        | 0.01 | 0.87                            | 0.02 | 0.98                            | 0.00 |
|              |                   | IRTree      | 0.97                        | 0.01 | 0.91        | 0.02 | 0.98        | 0.01 | 0.88                            | 0.03 | 0.98                            | 0.00 |
|              | IRTree            | GPCM        | 0.92                        | 0.01 | 0.70        | 0.04 | 0.96        | 0.01 | 0.74                            | 0.04 | 0.95                            | 0.01 |
|              |                   | IRTree      | 0.94                        | 0.01 | 0.85        | 0.03 | 0.96        | 0.01 | 0.78                            | 0.03 | 0.97                            | 0.01 |
|              | IRTree:Non-Invar. | GPCM        | 0.92                        | 0.01 | 0.73        | 0.03 | 0.96        | 0.01 | 0.75                            | 0.04 | 0.95                            | 0.01 |
|              |                   | IRTree      | 0.94                        | 0.01 | 0.85        | 0.03 | 0.96        | 0.01 | 0.78                            | 0.03 | 0.97                            | 0.01 |
| 0.2          | GPCM              | GPCM        | 0.96                        | 0.01 | 0.93        | 0.02 | 0.97        | 0.01 | 0.90                            | 0.02 | 0.98                            | 0.00 |
|              |                   | IRTree      | 0.96                        | 0.01 | 0.93        | 0.02 | 0.97        | 0.01 | 0.90                            | 0.02 | 0.98                            | 0.00 |
|              | IRTree            | GPCM        | 0.91                        | 0.01 | 0.75        | 0.03 | 0.95        | 0.01 | 0.79                            | 0.03 | 0.94                            | 0.01 |
|              |                   | IRTree      | 0.94                        | 0.01 | 0.88        | 0.02 | 0.95        | 0.01 | 0.82                            | 0.02 | 0.97                            | 0.01 |
|              | IRTree:Non-Invar. | GPCM        | 0.91                        | 0.01 | 0.77        | 0.03 | 0.95        | 0.01 | 0.80                            | 0.03 | 0.94                            | 0.01 |
|              |                   | IRTree      | 0.94                        | 0.01 | 0.88        | 0.02 | 0.95        | 0.01 | 0.82                            | 0.02 | 0.97                            | 0.01 |
| 0.25         | GPCM              | GPCM        | 0.96                        | 0.01 | 0.94        | 0.02 | 0.97        | 0.01 | 0.91                            | 0.02 | 0.98                            | 0.01 |
|              |                   | IRTree      | 0.96                        | 0.01 | 0.94        | 0.02 | 0.97        | 0.01 | 0.92                            | 0.02 | 0.98                            | 0.01 |
|              | IRTree            | GPCM        | 0.91                        | 0.01 | 0.80        | 0.03 | 0.95        | 0.01 | 0.84                            | 0.02 | 0.93                            | 0.01 |
|              |                   | IRTree      | 0.93                        | 0.01 | 0.90        | 0.02 | 0.95        | 0.01 | 0.85                            | 0.02 | 0.96                            | 0.01 |
|              | IRTree:Non-Invar. | GPCM        | 0.92                        | 0.01 | 0.81        | 0.03 | 0.95        | 0.01 | 0.84                            | 0.02 | 0.94                            | 0.01 |
|              |                   | IRTree      | 0.93                        | 0.01 | 0.90        | 0.02 | 0.95        | 0.01 | 0.85                            | 0.02 | 0.97                            | 0.01 |
| 0.5          | GPCM              | GPCM        | 0.96                        | 0.01 | 0.96        | 0.01 | 0.96        | 0.01 | 0.96                            | 0.01 | 0.96                            | 0.01 |
|              |                   | IRTree      | 0.96                        | 0.01 | 0.96        | 0.01 | 0.96        | 0.01 | 0.96                            | 0.01 | 0.96                            | 0.01 |
|              | IRTree            | GPCM        | 0.93                        | 0.01 | 0.93        | 0.01 | 0.93        | 0.01 | 0.93                            | 0.01 | 0.93                            | 0.01 |
|              |                   | IRTree      | 0.93                        | 0.01 | 0.93        | 0.01 | 0.93        | 0.01 | 0.93                            | 0.01 | 0.93                            | 0.01 |
|              | IRTree:Non-Invar. | GPCM        | 0.93                        | 0.01 | 0.93        | 0.01 | 0.93        | 0.01 | 0.93                            | 0.01 | 0.93                            | 0.01 |
|              |                   | IRTree      | 0.93                        | 0.01 | 0.93        | 0.01 | 0.93        | 0.01 | 0.93                            | 0.01 | 0.93                            | 0.01 |
| 0.6          | GPCM              | GPCM        | 0.95                        | 0.01 | 0.96        | 0.01 | 0.95        | 0.01 | 0.97                            | 0.01 | 0.94                            | 0.01 |
|              |                   | IRTree      | 0.95                        | 0.01 | 0.96        | 0.01 | 0.95        | 0.01 | 0.96                            | 0.01 | 0.94                            | 0.01 |
|              | IRTree            | GPCM        | 0.92                        | 0.01 | 0.94        | 0.01 | 0.90        | 0.02 | 0.93                            | 0.01 | 0.91                            | 0.02 |
|              |                   | IRTree      | 0.93                        | 0.01 | 0.94        | 0.01 | 0.92        | 0.01 | 0.95                            | 0.01 | 0.91                            | 0.02 |
|              | IRTree:Non-Invar. | GPCM        | 0.93                        | 0.01 | 0.94        | 0.01 | 0.90        | 0.02 | 0.94                            | 0.01 | 0.91                            | 0.01 |
|              |                   | IRTree      | 0.93                        | 0.01 | 0.94        | 0.01 | 0.92        | 0.02 | 0.95                            | 0.01 | 0.91                            | 0.01 |

|     |                   |        |      |      |      |      |      |      |      |      |      |      |
|-----|-------------------|--------|------|------|------|------|------|------|------|------|------|------|
| 0.7 | GPCM              | GPCM   | 0.95 | 0.01 | 0.96 | 0.01 | 0.93 | 0.02 | 0.97 | 0.01 | 0.91 | 0.02 |
|     |                   | IRTree | 0.95 | 0.01 | 0.96 | 0.01 | 0.93 | 0.02 | 0.97 | 0.01 | 0.91 | 0.02 |
|     | IRTree            | GPCM   | 0.91 | 0.01 | 0.95 | 0.01 | 0.84 | 0.03 | 0.93 | 0.01 | 0.87 | 0.02 |
|     |                   | IRTree | 0.93 | 0.01 | 0.94 | 0.01 | 0.91 | 0.02 | 0.96 | 0.01 | 0.87 | 0.02 |
|     | IRTree:Non-Invar. | GPCM   | 0.92 | 0.01 | 0.95 | 0.01 | 0.85 | 0.03 | 0.94 | 0.01 | 0.88 | 0.02 |
|     |                   | IRTree | 0.93 | 0.01 | 0.94 | 0.01 | 0.91 | 0.02 | 0.96 | 0.01 | 0.87 | 0.02 |
| 0.8 | GPCM              | GPCM   | 0.95 | 0.01 | 0.97 | 0.01 | 0.90 | 0.02 | 0.98 | 0.01 | 0.87 | 0.02 |
|     |                   | IRTree | 0.95 | 0.01 | 0.97 | 0.01 | 0.90 | 0.02 | 0.98 | 0.01 | 0.87 | 0.02 |
|     | IRTree            | GPCM   | 0.91 | 0.01 | 0.95 | 0.01 | 0.75 | 0.03 | 0.94 | 0.01 | 0.79 | 0.03 |
|     |                   | IRTree | 0.94 | 0.01 | 0.95 | 0.01 | 0.88 | 0.02 | 0.97 | 0.01 | 0.82 | 0.02 |
|     | IRTree:Non-Invar. | GPCM   | 0.91 | 0.01 | 0.95 | 0.01 | 0.76 | 0.03 | 0.94 | 0.01 | 0.80 | 0.03 |
|     |                   | IRTree | 0.94 | 0.01 | 0.95 | 0.01 | 0.88 | 0.02 | 0.97 | 0.01 | 0.82 | 0.02 |
| 0.9 | GPCM              | GPCM   | 0.96 | 0.01 | 0.98 | 0.00 | 0.84 | 0.04 | 0.98 | 0.00 | 0.81 | 0.03 |
|     |                   | IRTree | 0.96 | 0.01 | 0.98 | 0.00 | 0.84 | 0.04 | 0.98 | 0.00 | 0.80 | 0.03 |
|     | IRTree            | GPCM   | 0.93 | 0.01 | 0.96 | 0.01 | 0.64 | 0.04 | 0.96 | 0.00 | 0.66 | 0.05 |
|     |                   | IRTree | 0.95 | 0.01 | 0.97 | 0.00 | 0.80 | 0.04 | 0.98 | 0.00 | 0.72 | 0.03 |
|     | IRTree:Non-Invar. | GPCM   | 0.93 | 0.01 | 0.96 | 0.01 | 0.63 | 0.04 | 0.96 | 0.00 | 0.65 | 0.04 |
|     |                   | IRTree | 0.95 | 0.01 | 0.97 | 0.00 | 0.79 | 0.04 | 0.98 | 0.00 | 0.72 | 0.03 |

**Table S4.** Simulation Results, N = 1000, n = 50.

| Sel. Rat e | Gen. Mod.         | Fit Mod. | Correct Decision Rate |      | Sensitivity |      | Specificity |      | Positive Predictive Value |      | Negative Predictive Value |      |
|------------|-------------------|----------|-----------------------|------|-------------|------|-------------|------|---------------------------|------|---------------------------|------|
|            |                   |          | M                     | SD   | M           | SD   | M           | SD   | M                         | SD   | M                         | SD   |
| 0.1        | GPCM              | GPCM     | 0.98                  | 0.00 | 0.91        | 0.03 | 0.99        | 0.00 | 0.89                      | 0.04 | 0.99                      | 0.00 |
|            |                   | IRTree   | 0.98                  | 0.00 | 0.91        | 0.04 | 0.99        | 0.00 | 0.88                      | 0.03 | 0.99                      | 0.00 |
|            | IRTree            | GPCM     | 0.94                  | 0.01 | 0.66        | 0.05 | 0.97        | 0.01 | 0.70                      | 0.04 | 0.96                      | 0.00 |
|            |                   | IRTree   | 0.96                  | 0.01 | 0.85        | 0.03 | 0.98        | 0.01 | 0.80                      | 0.04 | 0.98                      | 0.00 |
|            | IRTree:Non-Invar. | GPCM     | 0.94                  | 0.01 | 0.70        | 0.05 | 0.97        | 0.01 | 0.72                      | 0.05 | 0.97                      | 0.01 |
|            |                   | IRTree   | 0.96                  | 0.01 | 0.85        | 0.04 | 0.98        | 0.00 | 0.81                      | 0.03 | 0.98                      | 0.00 |
| 0.15       | GPCM              | GPCM     | 0.98                  | 0.00 | 0.93        | 0.02 | 0.98        | 0.01 | 0.91                      | 0.03 | 0.99                      | 0.00 |
|            |                   | IRTree   | 0.98                  | 0.00 | 0.93        | 0.02 | 0.98        | 0.01 | 0.91                      | 0.03 | 0.99                      | 0.00 |
|            | IRTree            | GPCM     | 0.93                  | 0.01 | 0.71        | 0.03 | 0.96        | 0.01 | 0.78                      | 0.04 | 0.95                      | 0.01 |
|            |                   | IRTree   | 0.96                  | 0.01 | 0.89        | 0.03 | 0.97        | 0.01 | 0.84                      | 0.03 | 0.98                      | 0.00 |
|            | IRTree:Non-Invar. | GPCM     | 0.93                  | 0.01 | 0.74        | 0.03 | 0.97        | 0.01 | 0.79                      | 0.03 | 0.96                      | 0.01 |
|            |                   | IRTree   | 0.96                  | 0.01 | 0.88        | 0.03 | 0.97        | 0.01 | 0.84                      | 0.03 | 0.98                      | 0.00 |
| 0.2        | GPCM              | GPCM     | 0.98                  | 0.01 | 0.94        | 0.02 | 0.98        | 0.01 | 0.94                      | 0.02 | 0.99                      | 0.00 |
|            |                   | IRTree   | 0.98                  | 0.01 | 0.94        | 0.02 | 0.98        | 0.01 | 0.94                      | 0.02 | 0.98                      | 0.00 |
|            | IRTree            | GPCM     | 0.92                  | 0.01 | 0.76        | 0.03 | 0.96        | 0.01 | 0.83                      | 0.03 | 0.94                      | 0.01 |
|            |                   | IRTree   | 0.95                  | 0.01 | 0.91        | 0.02 | 0.97        | 0.01 | 0.87                      | 0.02 | 0.98                      | 0.01 |

|      |                   |        |      |      |      |      |      |      |      |      |      |      |
|------|-------------------|--------|------|------|------|------|------|------|------|------|------|------|
|      | IRTree:Non-Invar. | GPCM   | 0.93 | 0.01 | 0.79 | 0.03 | 0.96 | 0.01 | 0.85 | 0.02 | 0.95 | 0.01 |
|      |                   | IRTree | 0.95 | 0.01 | 0.91 | 0.02 | 0.97 | 0.01 | 0.87 | 0.02 | 0.98 | 0.01 |
| 0.25 | GPCM              | GPCM   | 0.97 | 0.01 | 0.95 | 0.02 | 0.98 | 0.01 | 0.94 | 0.02 | 0.98 | 0.01 |
|      |                   | IRTree | 0.97 | 0.01 | 0.95 | 0.02 | 0.98 | 0.01 | 0.94 | 0.02 | 0.98 | 0.01 |
|      | IRTree            | GPCM   | 0.92 | 0.01 | 0.82 | 0.03 | 0.96 | 0.01 | 0.87 | 0.02 | 0.94 | 0.01 |
|      |                   | IRTree | 0.95 | 0.01 | 0.93 | 0.02 | 0.96 | 0.01 | 0.89 | 0.02 | 0.98 | 0.01 |
|      | IRTree:Non-Invar. | GPCM   | 0.93 | 0.01 | 0.83 | 0.03 | 0.96 | 0.01 | 0.87 | 0.02 | 0.94 | 0.01 |
|      |                   | IRTree | 0.95 | 0.01 | 0.92 | 0.02 | 0.96 | 0.01 | 0.89 | 0.02 | 0.97 | 0.01 |
| 0.5  | GPCM              | GPCM   | 0.97 | 0.00 | 0.97 | 0.01 | 0.97 | 0.01 | 0.97 | 0.01 | 0.97 | 0.01 |
|      |                   | IRTree | 0.97 | 0.01 | 0.97 | 0.01 | 0.97 | 0.01 | 0.97 | 0.01 | 0.97 | 0.01 |
|      | IRTree            | GPCM   | 0.95 | 0.01 | 0.95 | 0.01 | 0.95 | 0.01 | 0.95 | 0.01 | 0.95 | 0.01 |
|      |                   | IRTree | 0.95 | 0.01 | 0.95 | 0.01 | 0.95 | 0.01 | 0.95 | 0.01 | 0.95 | 0.01 |
|      | IRTree:Non-Invar. | GPCM   | 0.95 | 0.01 | 0.95 | 0.01 | 0.95 | 0.01 | 0.95 | 0.01 | 0.95 | 0.01 |
|      |                   | IRTree | 0.95 | 0.01 | 0.95 | 0.01 | 0.95 | 0.01 | 0.95 | 0.01 | 0.95 | 0.01 |
| 0.6  | GPCM              | GPCM   | 0.97 | 0.01 | 0.97 | 0.01 | 0.96 | 0.01 | 0.97 | 0.01 | 0.96 | 0.01 |
|      |                   | IRTree | 0.97 | 0.01 | 0.97 | 0.01 | 0.96 | 0.01 | 0.97 | 0.01 | 0.95 | 0.01 |
|      | IRTree            | GPCM   | 0.94 | 0.01 | 0.96 | 0.01 | 0.92 | 0.02 | 0.95 | 0.01 | 0.94 | 0.01 |
|      |                   | IRTree | 0.95 | 0.01 | 0.95 | 0.01 | 0.94 | 0.02 | 0.96 | 0.01 | 0.93 | 0.01 |
|      | IRTree:Non-Invar. | GPCM   | 0.94 | 0.01 | 0.96 | 0.01 | 0.92 | 0.02 | 0.95 | 0.01 | 0.94 | 0.01 |
|      |                   | IRTree | 0.95 | 0.01 | 0.95 | 0.01 | 0.94 | 0.01 | 0.96 | 0.01 | 0.93 | 0.01 |
| 0.7  | GPCM              | GPCM   | 0.97 | 0.01 | 0.97 | 0.01 | 0.95 | 0.01 | 0.98 | 0.01 | 0.94 | 0.02 |
|      |                   | IRTree | 0.97 | 0.01 | 0.97 | 0.01 | 0.95 | 0.01 | 0.98 | 0.01 | 0.94 | 0.02 |
|      | IRTree            | GPCM   | 0.93 | 0.01 | 0.96 | 0.01 | 0.85 | 0.02 | 0.94 | 0.01 | 0.90 | 0.02 |
|      |                   | IRTree | 0.95 | 0.01 | 0.96 | 0.01 | 0.93 | 0.02 | 0.97 | 0.01 | 0.91 | 0.02 |
|      | IRTree:Non-Invar. | GPCM   | 0.93 | 0.01 | 0.96 | 0.01 | 0.87 | 0.02 | 0.94 | 0.01 | 0.91 | 0.02 |
|      |                   | IRTree | 0.95 | 0.01 | 0.96 | 0.01 | 0.93 | 0.01 | 0.97 | 0.01 | 0.91 | 0.02 |
| 0.8  | GPCM              | GPCM   | 0.97 | 0.01 | 0.98 | 0.01 | 0.93 | 0.02 | 0.98 | 0.01 | 0.91 | 0.02 |
|      |                   | IRTree | 0.97 | 0.01 | 0.97 | 0.01 | 0.93 | 0.02 | 0.98 | 0.01 | 0.90 | 0.02 |
|      | IRTree            | GPCM   | 0.92 | 0.01 | 0.96 | 0.01 | 0.76 | 0.03 | 0.94 | 0.01 | 0.83 | 0.02 |
|      |                   | IRTree | 0.95 | 0.01 | 0.97 | 0.01 | 0.90 | 0.02 | 0.98 | 0.01 | 0.87 | 0.02 |
|      | IRTree:Non-Invar. | GPCM   | 0.92 | 0.01 | 0.96 | 0.01 | 0.76 | 0.03 | 0.94 | 0.01 | 0.83 | 0.03 |
|      |                   | IRTree | 0.95 | 0.01 | 0.97 | 0.01 | 0.91 | 0.02 | 0.98 | 0.01 | 0.87 | 0.02 |
| 0.9  | GPCM              | GPCM   | 0.97 | 0.01 | 0.98 | 0.00 | 0.88 | 0.04 | 0.99 | 0.00 | 0.86 | 0.03 |
|      |                   | IRTree | 0.97 | 0.01 | 0.98 | 0.00 | 0.88 | 0.04 | 0.99 | 0.00 | 0.85 | 0.03 |
|      | IRTree            | GPCM   | 0.93 | 0.01 | 0.97 | 0.01 | 0.65 | 0.04 | 0.96 | 0.00 | 0.69 | 0.04 |
|      |                   | IRTree | 0.96 | 0.01 | 0.98 | 0.01 | 0.85 | 0.04 | 0.98 | 0.00 | 0.80 | 0.04 |
|      | IRTree:Non-Invar. | GPCM   | 0.94 | 0.01 | 0.97 | 0.01 | 0.66 | 0.04 | 0.96 | 0.00 | 0.69 | 0.04 |
|      |                   | IRTree | 0.96 | 0.01 | 0.98 | 0.01 | 0.85 | 0.04 | 0.98 | 0.00 | 0.79 | 0.04 |

---

**Table S5.** Simulation Results, N = 2000, n = 25.

| Sel.<br>Rate | Gen. Mod.         | Fit<br>Mod. | Correct<br>Decision<br>Rate |      | Sensitivity |      | Specificity |      | Positive<br>Predictive<br>Value |      | Negative<br>Predictive<br>Value |      |
|--------------|-------------------|-------------|-----------------------------|------|-------------|------|-------------|------|---------------------------------|------|---------------------------------|------|
|              |                   |             | M                           | SD   | M           | SD   | M           | SD   | M                               | SD   | M                               | SD   |
| 0.1          | GPCM              | GPCM        | 0.97                        | 0.00 | 0.88        | 0.03 | 0.98        | 0.00 | 0.85                            | 0.03 | 0.99                            | 0.00 |
|              |                   | IRTree      | 0.97                        | 0.00 | 0.88        | 0.03 | 0.98        | 0.00 | 0.84                            | 0.03 | 0.99                            | 0.00 |
|              | IRTree            | GPCM        | 0.93                        | 0.01 | 0.63        | 0.03 | 0.96        | 0.00 | 0.65                            | 0.03 | 0.96                            | 0.00 |
|              |                   | IRTree      | 0.95                        | 0.00 | 0.80        | 0.03 | 0.97        | 0.00 | 0.72                            | 0.02 | 0.98                            | 0.00 |
|              | IRTree:Non-Invar. | GPCM        | 0.93                        | 0.01 | 0.67        | 0.03 | 0.96        | 0.00 | 0.67                            | 0.03 | 0.96                            | 0.00 |
|              |                   | IRTree      | 0.95                        | 0.00 | 0.80        | 0.03 | 0.97        | 0.00 | 0.72                            | 0.02 | 0.98                            | 0.00 |
| 0.15         | GPCM              | GPCM        | 0.97                        | 0.00 | 0.92        | 0.02 | 0.98        | 0.00 | 0.88                            | 0.02 | 0.99                            | 0.00 |
|              |                   | IRTree      | 0.97                        | 0.00 | 0.91        | 0.02 | 0.98        | 0.00 | 0.88                            | 0.02 | 0.98                            | 0.00 |
|              | IRTree            | GPCM        | 0.92                        | 0.01 | 0.70        | 0.03 | 0.96        | 0.01 | 0.74                            | 0.03 | 0.95                            | 0.00 |
|              |                   | IRTree      | 0.94                        | 0.01 | 0.85        | 0.02 | 0.96        | 0.00 | 0.78                            | 0.02 | 0.97                            | 0.00 |
|              | IRTree:Non-Invar. | GPCM        | 0.92                        | 0.01 | 0.72        | 0.02 | 0.96        | 0.00 | 0.74                            | 0.02 | 0.95                            | 0.00 |
|              |                   | IRTree      | 0.94                        | 0.01 | 0.85        | 0.02 | 0.96        | 0.01 | 0.78                            | 0.02 | 0.97                            | 0.00 |
| 0.2          | GPCM              | GPCM        | 0.96                        | 0.00 | 0.93        | 0.02 | 0.97        | 0.00 | 0.90                            | 0.02 | 0.98                            | 0.00 |
|              |                   | IRTree      | 0.96                        | 0.00 | 0.92        | 0.02 | 0.97        | 0.00 | 0.90                            | 0.02 | 0.98                            | 0.00 |
|              | IRTree            | GPCM        | 0.91                        | 0.01 | 0.75        | 0.03 | 0.95        | 0.01 | 0.80                            | 0.02 | 0.94                            | 0.01 |
|              |                   | IRTree      | 0.94                        | 0.01 | 0.88        | 0.02 | 0.95        | 0.00 | 0.82                            | 0.02 | 0.97                            | 0.00 |
|              | IRTree:Non-Invar. | GPCM        | 0.92                        | 0.01 | 0.78        | 0.02 | 0.95        | 0.01 | 0.80                            | 0.02 | 0.94                            | 0.01 |
|              |                   | IRTree      | 0.94                        | 0.01 | 0.88        | 0.02 | 0.95        | 0.01 | 0.81                            | 0.02 | 0.97                            | 0.00 |
| 0.25         | GPCM              | GPCM        | 0.96                        | 0.00 | 0.94        | 0.01 | 0.97        | 0.01 | 0.92                            | 0.01 | 0.98                            | 0.00 |
|              |                   | IRTree      | 0.96                        | 0.00 | 0.93        | 0.01 | 0.97        | 0.01 | 0.92                            | 0.01 | 0.98                            | 0.00 |
|              | IRTree            | GPCM        | 0.91                        | 0.01 | 0.80        | 0.02 | 0.95        | 0.01 | 0.84                            | 0.02 | 0.93                            | 0.01 |
|              |                   | IRTree      | 0.93                        | 0.01 | 0.90        | 0.01 | 0.95        | 0.01 | 0.85                            | 0.02 | 0.97                            | 0.00 |
|              | IRTree:Non-Invar. | GPCM        | 0.92                        | 0.01 | 0.81        | 0.02 | 0.95        | 0.01 | 0.84                            | 0.02 | 0.94                            | 0.01 |
|              |                   | IRTree      | 0.93                        | 0.01 | 0.90        | 0.02 | 0.95        | 0.01 | 0.85                            | 0.02 | 0.96                            | 0.01 |
| 0.5          | GPCM              | GPCM        | 0.96                        | 0.01 | 0.95        | 0.01 | 0.96        | 0.01 | 0.96                            | 0.01 | 0.95                            | 0.01 |
|              |                   | IRTree      | 0.96                        | 0.01 | 0.96        | 0.01 | 0.96        | 0.01 | 0.96                            | 0.01 | 0.96                            | 0.01 |
|              | IRTree            | GPCM        | 0.93                        | 0.01 | 0.93        | 0.01 | 0.93        | 0.01 | 0.93                            | 0.01 | 0.93                            | 0.01 |
|              |                   | IRTree      | 0.93                        | 0.01 | 0.93        | 0.01 | 0.93        | 0.01 | 0.93                            | 0.01 | 0.93                            | 0.01 |
|              | IRTree:Non-Invar. | GPCM        | 0.93                        | 0.01 | 0.93        | 0.01 | 0.93        | 0.01 | 0.93                            | 0.01 | 0.93                            | 0.01 |
|              |                   | IRTree      | 0.93                        | 0.01 | 0.93        | 0.01 | 0.93        | 0.01 | 0.93                            | 0.01 | 0.93                            | 0.01 |
| 0.6          | GPCM              | GPCM        | 0.95                        | 0.01 | 0.96        | 0.01 | 0.95        | 0.01 | 0.97                            | 0.01 | 0.94                            | 0.01 |
|              |                   | IRTree      | 0.95                        | 0.01 | 0.96        | 0.01 | 0.95        | 0.01 | 0.96                            | 0.01 | 0.94                            | 0.01 |
|              | IRTree            | GPCM        | 0.93                        | 0.01 | 0.94        | 0.01 | 0.90        | 0.01 | 0.94                            | 0.01 | 0.91                            | 0.01 |
|              |                   | IRTree      | 0.93                        | 0.01 | 0.94        | 0.01 | 0.92        | 0.01 | 0.95                            | 0.01 | 0.91                            | 0.01 |
|              | IRTree:Non-Invar. | GPCM        | 0.93                        | 0.01 | 0.94        | 0.01 | 0.91        | 0.01 | 0.94                            | 0.01 | 0.91                            | 0.01 |
|              |                   | IRTree      | 0.93                        | 0.01 | 0.94        | 0.01 | 0.92        | 0.01 | 0.95                            | 0.01 | 0.91                            | 0.01 |

|     |                   |        |      |      |      |      |      |      |      |      |      |      |
|-----|-------------------|--------|------|------|------|------|------|------|------|------|------|------|
| 0.7 | GPCM              | GPCM   | 0.95 | 0.01 | 0.96 | 0.01 | 0.93 | 0.01 | 0.97 | 0.01 | 0.91 | 0.01 |
|     |                   | IRTree | 0.95 | 0.01 | 0.96 | 0.01 | 0.93 | 0.01 | 0.97 | 0.01 | 0.91 | 0.01 |
|     | IRTree            | GPCM   | 0.92 | 0.01 | 0.95 | 0.01 | 0.84 | 0.02 | 0.93 | 0.01 | 0.87 | 0.02 |
|     |                   | IRTree | 0.93 | 0.01 | 0.94 | 0.01 | 0.91 | 0.01 | 0.96 | 0.00 | 0.88 | 0.01 |
|     | IRTree:Non-Invar. | GPCM   | 0.92 | 0.01 | 0.95 | 0.01 | 0.85 | 0.02 | 0.94 | 0.01 | 0.87 | 0.01 |
|     |                   | IRTree | 0.93 | 0.01 | 0.94 | 0.01 | 0.91 | 0.01 | 0.96 | 0.01 | 0.87 | 0.01 |
| 0.8 | GPCM              | GPCM   | 0.95 | 0.01 | 0.97 | 0.01 | 0.91 | 0.02 | 0.98 | 0.00 | 0.87 | 0.02 |
|     |                   | IRTree | 0.95 | 0.01 | 0.97 | 0.00 | 0.90 | 0.02 | 0.98 | 0.00 | 0.87 | 0.02 |
|     | IRTree            | GPCM   | 0.91 | 0.01 | 0.95 | 0.01 | 0.74 | 0.03 | 0.94 | 0.01 | 0.79 | 0.02 |
|     |                   | IRTree | 0.94 | 0.01 | 0.95 | 0.01 | 0.88 | 0.02 | 0.97 | 0.00 | 0.82 | 0.02 |
|     | IRTree:Non-Invar. | GPCM   | 0.91 | 0.01 | 0.95 | 0.01 | 0.75 | 0.03 | 0.94 | 0.01 | 0.80 | 0.02 |
|     |                   | IRTree | 0.94 | 0.01 | 0.95 | 0.00 | 0.88 | 0.02 | 0.97 | 0.00 | 0.82 | 0.02 |
| 0.9 | GPCM              | GPCM   | 0.96 | 0.00 | 0.98 | 0.00 | 0.84 | 0.03 | 0.98 | 0.00 | 0.80 | 0.02 |
|     |                   | IRTree | 0.96 | 0.00 | 0.98 | 0.00 | 0.84 | 0.03 | 0.98 | 0.00 | 0.80 | 0.02 |
|     | IRTree            | GPCM   | 0.93 | 0.01 | 0.96 | 0.00 | 0.64 | 0.04 | 0.96 | 0.00 | 0.65 | 0.04 |
|     |                   | IRTree | 0.95 | 0.00 | 0.97 | 0.00 | 0.80 | 0.03 | 0.98 | 0.00 | 0.72 | 0.03 |
|     | IRTree:Non-Invar. | GPCM   | 0.93 | 0.01 | 0.96 | 0.00 | 0.63 | 0.03 | 0.96 | 0.00 | 0.65 | 0.03 |
|     |                   | IRTree | 0.95 | 0.01 | 0.97 | 0.00 | 0.80 | 0.03 | 0.98 | 0.00 | 0.72 | 0.02 |

**Table S6.** Simulation Results, N = 2000, n = 50.

| Sel. Rat e | Gen. Mod.         | Fit Mod. | Correct Decision Rate |      | Sensitivity |      | Specificity |      | Positive Predictive Value |      | Negative Predictive Value |      |
|------------|-------------------|----------|-----------------------|------|-------------|------|-------------|------|---------------------------|------|---------------------------|------|
|            |                   |          | M                     | SD   | M           | SD   | M           | SD   | M                         | SD   | M                         | SD   |
| 0.1        | GPCM              | GPCM     | 0.98                  | 0.00 | 0.92        | 0.02 | 0.99        | 0.00 | 0.89                      | 0.02 | 0.99                      | 0.00 |
|            |                   | IRTree   | 0.98                  | 0.00 | 0.92        | 0.02 | 0.99        | 0.00 | 0.88                      | 0.02 | 0.99                      | 0.00 |
|            | IRTree            | GPCM     | 0.94                  | 0.01 | 0.65        | 0.03 | 0.97        | 0.00 | 0.70                      | 0.03 | 0.96                      | 0.00 |
|            |                   | IRTree   | 0.96                  | 0.00 | 0.85        | 0.03 | 0.98        | 0.00 | 0.80                      | 0.02 | 0.98                      | 0.00 |
|            | IRTree:Non-Invar. | GPCM     | 0.94                  | 0.01 | 0.69        | 0.03 | 0.97        | 0.00 | 0.72                      | 0.03 | 0.97                      | 0.00 |
|            |                   | IRTree   | 0.96                  | 0.00 | 0.85        | 0.03 | 0.98        | 0.00 | 0.80                      | 0.03 | 0.98                      | 0.00 |
| 0.15       | GPCM              | GPCM     | 0.98                  | 0.00 | 0.93        | 0.02 | 0.98        | 0.00 | 0.92                      | 0.02 | 0.99                      | 0.00 |
|            |                   | IRTree   | 0.98                  | 0.00 | 0.93        | 0.02 | 0.98        | 0.00 | 0.91                      | 0.02 | 0.99                      | 0.00 |
|            | IRTree            | GPCM     | 0.93                  | 0.01 | 0.71        | 0.03 | 0.96        | 0.00 | 0.77                      | 0.03 | 0.95                      | 0.00 |
|            |                   | IRTree   | 0.96                  | 0.00 | 0.89        | 0.02 | 0.97        | 0.00 | 0.84                      | 0.02 | 0.98                      | 0.00 |
|            | IRTree:Non-Invar. | GPCM     | 0.93                  | 0.01 | 0.75        | 0.02 | 0.97        | 0.00 | 0.79                      | 0.02 | 0.96                      | 0.00 |
|            |                   | IRTree   | 0.96                  | 0.00 | 0.89        | 0.02 | 0.97        | 0.00 | 0.84                      | 0.02 | 0.98                      | 0.00 |
| 0.2        | GPCM              | GPCM     | 0.97                  | 0.00 | 0.95        | 0.01 | 0.98        | 0.00 | 0.93                      | 0.02 | 0.99                      | 0.00 |
|            |                   | IRTree   | 0.98                  | 0.00 | 0.94        | 0.01 | 0.98        | 0.00 | 0.93                      | 0.01 | 0.99                      | 0.00 |
|            | IRTree            | GPCM     | 0.92                  | 0.01 | 0.76        | 0.02 | 0.96        | 0.01 | 0.83                      | 0.02 | 0.94                      | 0.01 |
|            |                   | IRTree   | 0.96                  | 0.01 | 0.91        | 0.02 | 0.97        | 0.00 | 0.87                      | 0.02 | 0.98                      | 0.00 |



|      |                   |        |      |      |      |      |      |      |      |      |      |      |
|------|-------------------|--------|------|------|------|------|------|------|------|------|------|------|
|      | IRTree:Non-Invar. | GPCM   | 0.93 | 0.01 | 0.79 | 0.02 | 0.96 | 0.00 | 0.84 | 0.02 | 0.95 | 0.01 |
|      |                   | IRTree | 0.96 | 0.00 | 0.91 | 0.01 | 0.97 | 0.00 | 0.87 | 0.02 | 0.98 | 0.00 |
| 0.25 | GPCM              | GPCM   | 0.97 | 0.00 | 0.95 | 0.01 | 0.98 | 0.01 | 0.94 | 0.01 | 0.98 | 0.00 |
|      |                   | IRTree | 0.97 | 0.00 | 0.95 | 0.01 | 0.98 | 0.00 | 0.95 | 0.01 | 0.98 | 0.00 |
|      | IRTree            | GPCM   | 0.92 | 0.01 | 0.81 | 0.02 | 0.96 | 0.01 | 0.87 | 0.02 | 0.94 | 0.01 |
|      |                   | IRTree | 0.95 | 0.00 | 0.92 | 0.01 | 0.96 | 0.01 | 0.89 | 0.01 | 0.97 | 0.00 |
|      | IRTree:Non-Invar. | GPCM   | 0.93 | 0.01 | 0.83 | 0.02 | 0.96 | 0.01 | 0.88 | 0.02 | 0.94 | 0.01 |
|      |                   | IRTree | 0.95 | 0.01 | 0.93 | 0.01 | 0.96 | 0.01 | 0.89 | 0.01 | 0.98 | 0.00 |
| 0.5  | GPCM              | GPCM   | 0.97 | 0.00 | 0.97 | 0.01 | 0.97 | 0.01 | 0.97 | 0.01 | 0.97 | 0.01 |
|      |                   | IRTree | 0.97 | 0.00 | 0.97 | 0.01 | 0.97 | 0.01 | 0.97 | 0.01 | 0.97 | 0.01 |
|      | IRTree            | GPCM   | 0.95 | 0.00 | 0.95 | 0.01 | 0.95 | 0.01 | 0.95 | 0.01 | 0.95 | 0.01 |
|      |                   | IRTree | 0.95 | 0.00 | 0.95 | 0.01 | 0.95 | 0.01 | 0.95 | 0.01 | 0.95 | 0.01 |
|      | IRTree:Non-Invar. | GPCM   | 0.95 | 0.01 | 0.95 | 0.01 | 0.95 | 0.01 | 0.95 | 0.01 | 0.95 | 0.01 |
|      |                   | IRTree | 0.95 | 0.01 | 0.95 | 0.01 | 0.95 | 0.01 | 0.95 | 0.01 | 0.95 | 0.01 |
| 0.6  | GPCM              | GPCM   | 0.97 | 0.00 | 0.97 | 0.01 | 0.96 | 0.01 | 0.97 | 0.01 | 0.96 | 0.01 |
|      |                   | IRTree | 0.97 | 0.00 | 0.97 | 0.01 | 0.96 | 0.01 | 0.97 | 0.01 | 0.96 | 0.01 |
|      | IRTree            | GPCM   | 0.94 | 0.01 | 0.96 | 0.01 | 0.92 | 0.01 | 0.95 | 0.01 | 0.94 | 0.01 |
|      |                   | IRTree | 0.95 | 0.00 | 0.96 | 0.01 | 0.95 | 0.01 | 0.96 | 0.01 | 0.93 | 0.01 |
|      | IRTree:Non-Invar. | GPCM   | 0.94 | 0.01 | 0.96 | 0.01 | 0.92 | 0.01 | 0.95 | 0.01 | 0.94 | 0.01 |
|      |                   | IRTree | 0.95 | 0.01 | 0.96 | 0.01 | 0.94 | 0.01 | 0.96 | 0.01 | 0.93 | 0.01 |
| 0.7  | GPCM              | GPCM   | 0.97 | 0.00 | 0.97 | 0.01 | 0.95 | 0.01 | 0.98 | 0.00 | 0.94 | 0.01 |
|      |                   | IRTree | 0.97 | 0.00 | 0.97 | 0.01 | 0.95 | 0.01 | 0.98 | 0.00 | 0.94 | 0.01 |
|      | IRTree            | GPCM   | 0.93 | 0.01 | 0.96 | 0.01 | 0.86 | 0.02 | 0.94 | 0.01 | 0.90 | 0.02 |
|      |                   | IRTree | 0.95 | 0.01 | 0.96 | 0.01 | 0.94 | 0.01 | 0.97 | 0.00 | 0.91 | 0.01 |
|      | IRTree:Non-Invar. | GPCM   | 0.93 | 0.01 | 0.96 | 0.01 | 0.87 | 0.02 | 0.94 | 0.01 | 0.91 | 0.01 |
|      |                   | IRTree | 0.95 | 0.00 | 0.96 | 0.01 | 0.94 | 0.01 | 0.97 | 0.00 | 0.91 | 0.01 |
| 0.8  | GPCM              | GPCM   | 0.97 | 0.00 | 0.98 | 0.00 | 0.93 | 0.02 | 0.98 | 0.00 | 0.91 | 0.02 |
|      |                   | IRTree | 0.97 | 0.00 | 0.98 | 0.00 | 0.93 | 0.02 | 0.98 | 0.00 | 0.91 | 0.02 |
|      | IRTree            | GPCM   | 0.92 | 0.01 | 0.96 | 0.01 | 0.76 | 0.02 | 0.94 | 0.01 | 0.83 | 0.02 |
|      |                   | IRTree | 0.96 | 0.00 | 0.97 | 0.01 | 0.91 | 0.02 | 0.98 | 0.00 | 0.87 | 0.02 |
|      | IRTree:Non-Invar. | GPCM   | 0.92 | 0.01 | 0.96 | 0.00 | 0.76 | 0.02 | 0.94 | 0.01 | 0.84 | 0.02 |
|      |                   | IRTree | 0.96 | 0.00 | 0.97 | 0.00 | 0.91 | 0.01 | 0.98 | 0.00 | 0.87 | 0.02 |
| 0.9  | GPCM              | GPCM   | 0.97 | 0.00 | 0.98 | 0.00 | 0.89 | 0.03 | 0.99 | 0.00 | 0.86 | 0.02 |
|      |                   | IRTree | 0.97 | 0.00 | 0.98 | 0.00 | 0.89 | 0.02 | 0.99 | 0.00 | 0.86 | 0.02 |
|      | IRTree            | GPCM   | 0.94 | 0.01 | 0.97 | 0.00 | 0.65 | 0.03 | 0.96 | 0.00 | 0.69 | 0.04 |
|      |                   | IRTree | 0.96 | 0.00 | 0.98 | 0.00 | 0.85 | 0.03 | 0.98 | 0.00 | 0.80 | 0.02 |
|      | IRTree:Non-Invar. | GPCM   | 0.94 | 0.01 | 0.97 | 0.00 | 0.66 | 0.03 | 0.96 | 0.00 | 0.70 | 0.03 |
|      |                   | IRTree | 0.96 | 0.00 | 0.98 | 0.00 | 0.85 | 0.03 | 0.98 | 0.00 | 0.80 | 0.02 |

---
